# Supplementary material for: A DFT study on nanocones, nanotubes (4,0), nanosheets and fullerene C60as anodes in Mg-ion batteries
Source: Royal Society of Chemistry journal article supplement (doi:10.1039/c8ra06031b), 2019-01-01
Supplement: c8ra06031b1.pdf [file c8ra06031b1.pdf]

Table 1S. Optimization geometries for the C60/Mg<sup>2+</sup> and C60/Mg complexes.

| Atom(s) | C60/Mg <sup>2+</sup> |        |        | C60/Mg |        |        |
|---------|----------------------|--------|--------|--------|--------|--------|
|         | X                    | Y      | Z      | X      | Y      | Z      |
| C       | -3.044               | -1.081 | 0.945  | -3.005 | -0.958 | -1.073 |
| C       | -3.044               | 0.313  | 1.403  | -2.999 | -1.418 | 0.302  |
| C       | -3.043               | 1.362  | 0.464  | -3.008 | -0.499 | 1.340  |
| C       | -3.043               | 1.062  | -0.972 | -3.022 | 0.921  | 1.051  |
| C       | -3.044               | -0.276 | -1.411 | -3.027 | 1.361  | -0.265 |
| C       | -3.045               | -1.370 | -0.433 | -3.018 | 0.400  | -1.350 |
| C       | -2.244               | -1.852 | 1.862  | -2.160 | -1.848 | -1.845 |
| C       | -1.732               | -0.940 | 2.866  | -1.632 | -2.856 | -0.948 |
| C       | -2.243               | 0.389  | 2.598  | -2.152 | -2.591 | 0.379  |
| C       | -1.432               | 1.505  | 2.770  | -1.349 | -2.793 | 1.491  |
| C       | -2.242               | 2.541  | 0.673  | -2.170 | -0.711 | 2.503  |
| C       | -2.242               | 2.058  | -1.635 | -2.193 | 1.587  | 2.035  |
| C       | -1.431               | 1.648  | -2.688 | -1.403 | 2.663  | 1.660  |
| C       | -1.431               | 0.268  | -3.142 | -1.408 | 3.123  | 0.285  |
| C       | -2.243               | -0.686 | -2.536 | -2.202 | 2.487  | -0.656 |
| C       | -1.732               | -2.011 | -2.249 | -1.683 | 2.221  | -1.983 |
| C       | -2.244               | -2.443 | -0.964 | -2.187 | 0.932  | -2.412 |
| C       | -1.433               | -3.151 | -0.083 | -1.379 | 0.082  | -3.149 |
| C       | -1.433               | -2.853 | 1.339  | -1.365 | -1.339 | -2.860 |
| C       | -0.429               | -1.088 | 3.314  | -0.333 | -3.312 | -1.105 |
| C       | 0.407                | -2.150 | 2.791  | 0.499  | -2.780 | -2.166 |
| C       | -0.084               | -3.021 | 1.831  | -0.006 | -1.816 | -3.025 |
| C       | 0.751                | -3.421 | 0.716  | 0.820  | -0.690 | -3.416 |
| C       | -0.084               | -3.502 | -0.466 | -0.029 | 0.482  | -3.493 |
| C       | 0.408                | -3.089 | -1.695 | 0.453  | 1.715  | -3.083 |
| C       | -0.428               | -2.326 | -2.600 | -0.392 | 2.604  | -2.311 |
| C       | 0.409                | -1.342 | -3.258 | 0.438  | 3.270  | -1.327 |
| C       | -0.082               | -0.075 | -3.532 | -0.058 | 3.524  | -0.058 |
| C       | -1.730               | 2.954  | -0.618 | -1.665 | 0.579  | 2.932  |
| C       | 2.560                | 1.835  | -1.830 | 2.608  | 1.847  | 1.845  |
| C       | 1.765                | 2.856  | -1.337 | 1.813  | 1.339  | 2.860  |
| C       | 1.765                | 3.153  | 0.080  | 1.827  | -0.082 | 3.150  |
| C       | 2.560                | 2.415  | 0.941  | 2.636  | -0.931 | 2.411  |
| C       | 3.397                | 1.351  | 0.425  | 3.467  | -0.400 | 1.350  |
| C       | 3.396                | -0.310 | -1.383 | 3.448  | 1.418  | -0.302 |
| C       | 2.559                | -0.394 | -2.562 | 2.600  | 2.590  | -0.379 |
| C       | 2.042                | 0.932  | -2.841 | 2.080  | 2.856  | 0.948  |
| C       | 0.754                | 1.090  | -3.320 | 0.781  | 3.312  | 1.105  |
| C       | -0.081               | 2.154  | -2.800 | -0.050 | 2.780  | 2.167  |
| C       | 0.410                | 3.012  | -1.828 | 0.454  | 1.816  | 3.025  |

|    |        |        |        |        |        |        |
|----|--------|--------|--------|--------|--------|--------|
| C  | 0.410  | 3.492  | 0.467  | 0.477  | -0.482 | 3.493  |
| C  | -0.082 | 3.096  | 1.701  | -0.005 | -1.715 | 3.083  |
| C  | 0.754  | 2.330  | 2.604  | 0.840  | -2.604 | 2.310  |
| C  | 2.042  | 1.993  | 2.229  | 2.131  | -2.221 | 1.982  |
| C  | 2.558  | 0.666  | 2.506  | 2.651  | -2.486 | 0.655  |
| C  | 3.396  | 0.271  | 1.391  | 3.476  | -1.361 | 0.264  |
| C  | 3.395  | -1.045 | 0.959  | 3.471  | -0.921 | -1.050 |
| C  | 3.396  | -1.342 | -0.459 | 3.457  | 0.499  | -1.340 |
| C  | 1.764  | -1.508 | -2.771 | 1.797  | 2.793  | -1.491 |
| C  | 1.763  | -2.588 | -1.805 | 1.807  | 1.832  | -2.576 |
| C  | 2.557  | -2.505 | -0.674 | 2.618  | 0.711  | -2.502 |
| C  | 2.040  | -2.928 | 0.613  | 2.113  | -0.579 | -2.931 |
| C  | 2.557  | -2.024 | 1.622  | 2.641  | -1.587 | -2.034 |
| C  | 1.763  | -1.647 | 2.691  | 1.852  | -2.663 | -1.660 |
| C  | 1.763  | -0.271 | 3.143  | 1.857  | -3.123 | -0.285 |
| C  | 0.408  | 0.076  | 3.523  | 0.506  | -3.524 | 0.058  |
| C  | -0.083 | 1.348  | 3.266  | 0.010  | -3.270 | 1.327  |
| C  | -0.426 | 3.415  | -0.714 | -0.371 | 0.690  | 3.416  |
| C  | -1.431 | 2.588  | 1.802  | -1.358 | -1.832 | 2.576  |
| C  | 3.397  | 1.067  | -0.931 | 3.453  | 0.958  | 1.073  |
| Mg | -4.930 | 0.000  | 0.000  | -6.725 | 0.000  | 0.000  |

---

Table 2S. Optimization geometries for the Cone/Mg<sup>2+</sup> and Cone/Mg complexes.

|   | Cone/Mg <sup>2+</sup> |        |        | Cone/Mg |        |        |
|---|-----------------------|--------|--------|---------|--------|--------|
|   | X                     | Y      | Z      | X       | Y      | Z      |
| C | 4.680                 | 4.633  | -1.096 | 0.82    | -6.540 | -1.127 |
| C | 3.456                 | 5.251  | -0.899 | 2.05    | -5.941 | -0.932 |
| C | 3.120                 | 6.531  | -1.488 | 3.28    | -6.453 | -1.518 |
| C | 0.766                 | 6.239  | -0.899 | 4.48    | -4.409 | -0.932 |
| C | 1.851                 | 6.997  | -1.488 | 4.42    | -5.731 | -1.518 |
| C | -0.567                | 6.561  | -1.096 | 5.55    | -3.549 | -1.127 |
| C | 7.227                 | 0.402  | -1.488 | -4.08   | -5.979 | -1.519 |
| C | 6.171                 | 1.200  | -0.899 | -2.80   | -5.629 | -0.933 |
| C | 6.065                 | 2.567  | -1.096 | -1.65   | -6.380 | -1.128 |
| C | 3.953                 | 2.649  | 0.130  | -0.30   | -4.753 | 0.091  |
| C | 4.932                 | 3.305  | -0.665 | -0.38   | -5.929 | -0.697 |
| C | 2.734                 | 3.320  | 0.433  | 0.97    | -4.188 | 0.391  |
| C | 2.436                 | 4.567  | -0.163 | 2.13    | -4.712 | -0.200 |
| C | 0.066                 | 4.300  | 0.432  | 3.36    | -2.671 | 0.392  |
| C | 1.100                 | 5.057  | -0.163 | 3.34    | -3.949 | -0.200 |
| C | -1.298                | 4.578  | 0.130  | 4.42    | -1.760 | 0.091  |
| C | -1.619                | 5.711  | -0.665 | 5.52    | -2.199 | -0.697 |
| C | -3.926                | 4.909  | -0.900 | 6.28    | 0.121  | -0.933 |
| C | -2.960                | 5.883  | -1.097 | 6.47    | -1.239 | -1.128 |
| C | -5.247                | 4.985  | -1.488 | 7.15    | 1.128  | -1.519 |
| C | 6.062                 | -1.664 | -0.899 | -5.01   | -3.793 | -0.933 |
| C | 7.176                 | -0.949 | -1.487 | -5.12   | -5.116 | -1.519 |
| C | 5.096                 | -0.906 | -0.163 | -3.82   | -3.488 | -0.200 |
| C | 5.150                 | 0.516  | -0.163 | -2.72   | -4.399 | -0.200 |
| C | 3.124                 | 0.598  | 1.203  | -1.42   | -2.827 | 1.150  |
| C | 4.110                 | 1.266  | 0.433  | -1.49   | -4.029 | 0.391  |
| C | 2.038                 | 1.365  | 1.704  | -0.15   | -2.416 | 1.659  |
| C | 1.741                 | 2.662  | 1.203  | 1.05    | -2.987 | 1.150  |
| C | -0.669                | 2.360  | 1.703  | 2.25    | -0.899 | 1.659  |
| C | 0.397                 | 3.156  | 1.203  | 2.24    | -2.231 | 1.150  |
| C | -1.994                | 2.478  | 1.203  | 3.16    | 0.078  | 1.150  |
| C | -2.313                | 3.626  | 0.432  | 4.28    | -0.371 | 0.391  |
| C | -4.470                | 2.609  | -0.163 | 4.78    | 1.958  | -0.201 |
| C | -3.590                | 3.728  | -0.164 | 5.14    | 0.579  | -0.200 |
| C | -5.697                | 2.656  | -0.899 | 5.57    | 2.906  | -0.933 |
| C | -6.083                | 3.923  | -1.488 | 6.81    | 2.436  | -1.519 |
| C | 4.667                 | -3.669 | -0.664 | -5.75   | -1.470 | -0.697 |
| C | 5.853                 | -3.020 | -1.095 | -5.96   | -2.808 | -1.128 |
| C | 3.741                 | -2.941 | 0.131  | -4.61   | -1.178 | 0.091  |
| C | 4.003                 | -1.574 | 0.433  | -3.68   | -2.217 | 0.391  |

|   |        |        |        |       |        |        |
|---|--------|--------|--------|-------|--------|--------|
| C | 1.929  | -1.516 | 1.704  | -2.34 | -0.595 | 1.655  |
| C | 3.070  | -0.833 | 1.203  | -2.51 | -1.924 | 1.150  |
| C | 0.958  | -0.753 | 2.361  | -1.17 | -0.295 | 2.320  |
| C | 1.013  | 0.678  | 2.361  | -0.07 | -1.205 | 2.320  |
| C | -1.218 | 0.046  | 2.361  | 0.77  | 0.925  | 2.320  |
| C | -0.332 | 1.173  | 2.361  | 1.12  | -0.446 | 2.320  |
| C | -2.451 | 0.093  | 1.704  | 1.54  | 1.865  | 1.658  |
| C | -2.879 | 1.353  | 1.203  | 2.81  | 1.445  | 1.150  |
| C | -4.756 | 0.181  | 0.131  | 3.04  | 3.665  | 0.090  |
| C | -4.070 | 1.392  | 0.433  | 3.58  | 2.378  | 0.390  |
| C | -5.933 | 0.225  | -0.664 | 3.79  | 4.572  | -0.698 |
| C | -6.416 | 1.488  | -1.095 | 5.09  | 4.186  | -1.125 |
| C | 3.048  | -5.498 | -0.899 | -6.21 | 0.925  | -0.934 |
| C | 4.316  | -4.975 | -1.095 | -6.58 | -0.395 | -1.128 |
| C | 2.083  | -4.738 | -0.163 | -5.02 | 1.230  | -0.200 |
| C | 2.474  | -3.518 | 0.433  | -4.29 | 0.181  | 0.390  |
| C | 1.534  | -2.787 | 1.203  | -3.13 | 0.485  | 1.150  |
| C | -0.846 | -2.303 | 1.704  | -1.29 | 2.046  | 1.658  |
| C | -0.420 | -1.144 | 2.361  | -0.64 | 1.021  | 2.320  |
| C | -2.176 | -2.320 | 1.203  | -0.50 | 3.126  | 1.145  |
| C | -2.973 | -1.131 | 1.204  | 0.90  | 3.035  | 1.145  |
| C | -4.655 | -2.263 | -0.163 | 1.04  | 5.067  | -0.200 |
| C | -4.164 | -1.079 | 0.433  | 1.67  | 3.958  | 0.390  |
| C | -5.883 | -2.217 | -0.899 | 1.82  | 6.016  | -0.934 |
| C | -6.510 | -0.997 | -1.095 | 3.17  | 5.777  | -1.125 |
| C | 2.616  | -6.749 | -1.488 | -6.94 | 2.035  | -1.515 |
| C | -0.260 | -4.293 | 0.432  | -3.24 | 2.817  | 0.390  |
| C | 0.157  | -3.177 | 1.203  | -2.60 | 1.798  | 1.145  |
| C | -1.641 | -4.467 | 0.130  | -2.54 | 4.024  | 0.090  |
| C | -2.581 | -3.440 | 0.433  | -1.15 | 4.140  | 0.390  |
| C | -4.287 | -4.597 | -0.899 | -1.04 | 6.200  | -0.935 |
| C | -3.863 | -3.445 | -0.163 | -0.38 | 5.155  | -0.200 |
| C | -5.611 | -4.573 | -1.488 | -0.21 | 7.236  | -1.520 |
| C | -6.363 | -3.450 | -1.487 | 1.13  | 7.145  | -1.520 |
| C | 0.291  | -6.279 | -0.900 | -5.15 | 3.596  | -0.934 |
| C | 0.714  | -5.126 | -0.163 | -4.49 | 2.556  | -0.200 |
| C | -1.063 | -6.499 | -1.097 | -4.51 | 4.804  | -1.130 |
| C | -2.047 | -5.572 | -0.666 | -3.17 | 5.020  | -0.695 |
| C | -3.398 | -5.641 | -1.097 | -2.40 | 6.136  | -1.130 |
| C | 1.315  | -7.117 | -1.488 | -6.44 | 3.290  | -1.520 |
| C | 1.615  | 7.939  | -1.974 | 5.31  | -6.118 | -2.005 |
| H | 3.909  | 7.096  | -1.974 | 3.25  | -7.425 | -2.005 |
| H | 5.442  | 5.144  | -1.679 | 0.76  | -7.457 | -1.711 |

|           |        |        |        |       |        |        |
|-----------|--------|--------|--------|-------|--------|--------|
| H         | 6.827  | 3.078  | -1.679 | -1.71 | -7.297 | -1.711 |
| H         | 8.050  | 0.917  | -1.974 | -4.17 | -6.947 | -2.004 |
| H         | 7.957  | -1.525 | -1.974 | -6.05 | -5.386 | -2.004 |
| H         | 6.574  | -3.587 | -1.679 | -6.85 | -3.035 | -1.711 |
| H         | 5.037  | -5.542 | -1.679 | -7.47 | -0.622 | -1.711 |
| H         | 3.360  | -7.372 | -1.974 | -7.89 | 1.824  | -2.004 |
| H         | 1.008  | -8.038 | -1.975 | -6.99 | 4.095  | -2.005 |
| H         | -1.380 | -7.360 | -1.680 | -5.00 | 5.580  | -1.711 |
| H         | -3.714 | -6.502 | -1.680 | -2.89 | 6.911  | -1.711 |
| H         | -5.973 | -5.473 | -1.974 | -0.70 | 8.074  | -2.005 |
| H         | -7.334 | -3.443 | -1.973 | 1.73  | 7.917  | -2.005 |
| H         | -7.427 | -0.962 | -1.678 | 3.76  | 6.483  | -1.711 |
| H         | -7.333 | 1.523  | -1.679 | 5.67  | 4.893  | -1.711 |
| H         | -7.052 | 3.989  | -1.974 | 7.46  | 3.165  | -2.004 |
| H         | -5.541 | 5.910  | -1.975 | 8.06  | 0.797  | -2.004 |
| H         | -3.210 | 6.765  | -1.680 | 7.32  | -1.574 | -1.711 |
| H         | -0.817 | 7.444  | -1.680 | 6.40  | -3.885 | -1.711 |
| <b>Mg</b> | 0.000  | 0.001  | 4.271  | -0.00 | 0.011  | 5.870  |

---

Table 3S. Optimization geometries for the Tube/Mg<sup>2+</sup> and Tube/Mg complexes.

|   | Tube/Mg <sup>2+</sup> |        |        | Tube/Mg |        |        |
|---|-----------------------|--------|--------|---------|--------|--------|
|   | X                     | Y      | Z      | X       | Y      | Z      |
| C | 1.214                 | 1.103  | 2.157  | 0.065   | 0.015  | 0.016  |
| C | 1.587                 | -0.127 | 1.508  | 0.100   | -0.009 | 1.523  |
| C | 1.183                 | 1.147  | 3.578  | 1.237   | 0.014  | -0.692 |
| C | 1.682                 | 0.015  | 4.323  | 2.550   | 0.115  | 0.046  |
| C | 1.118                 | 1.270  | 6.401  | 3.759   | 0.279  | -2.078 |
| C | 1.771                 | 0.073  | 5.742  | 3.718   | 0.313  | -0.605 |
| C | 1.100                 | 1.271  | 7.811  | 4.951   | 0.452  | -2.704 |
| C | 1.779                 | 0.110  | 8.500  | 6.155   | 0.706  | -1.886 |
| C | 1.190                 | 1.224  | 10.650 | 7.404   | 0.790  | -4.016 |
| C | 1.675                 | 0.084  | 9.928  | 7.344   | 0.853  | -2.520 |
| C | 1.203                 | 1.190  | 12.063 | 8.646   | 0.955  | -4.620 |
| C | 1.695                 | -0.010 | 12.723 | 9.837   | 1.206  | -3.778 |
| C | 1.156                 | 0.984  | 14.879 | 11.161  | 1.410  | -5.811 |
| C | 1.750                 | -0.070 | 14.126 | 11.079  | 1.389  | -4.377 |
| C | -1.173                | 1.150  | 2.126  | -0.786  | 1.856  | -1.365 |
| C | 0.038                 | 1.472  | 1.436  | -1.160  | 0.715  | -0.531 |
| C | -1.167                | 1.180  | 3.545  | 0.460   | 1.995  | -1.829 |
| C | 0.002                 | 1.666  | 4.256  | 1.320   | 0.813  | -1.955 |
| C | -1.226                | 1.272  | 6.402  | 2.964   | 2.360  | -2.953 |
| C | -0.032                | 1.694  | 5.673  | 2.527   | 0.898  | -2.703 |
| C | -1.226                | 1.288  | 7.816  | 4.174   | 2.552  | -3.578 |
| C | -0.034                | 1.738  | 8.534  | 4.951   | 1.280  | -3.985 |
| C | -1.183                | 1.237  | 10.681 | 6.698   | 2.854  | -4.869 |
| C | 0.001                 | 1.690  | 9.946  | 6.263   | 1.520  | -4.533 |
| C | -1.181                | 1.210  | 12.084 | 7.948   | 3.024  | -5.494 |
| C | 0.023                 | 1.609  | 12.797 | 8.750   | 1.835  | -5.768 |
| C | -1.093                | 1.002  | 14.895 | 10.528  | 3.277  | -6.604 |
| C | 0.033                 | 1.594  | 14.217 | 9.988   | 1.965  | -6.426 |
| C | -1.179                | -1.226 | 2.224  | 0.085   | 2.434  | 0.876  |
| C | -1.536                | -0.073 | 1.462  | -1.139  | 2.229  | 0.002  |
| C | -1.197                | -1.156 | 3.626  | 1.271   | 2.833  | 0.322  |
| C | -1.656                | 0.049  | 4.290  | 1.387   | 2.927  | -1.165 |
| C | -1.277                | -1.087 | 6.442  | 3.801   | 3.395  | -0.990 |
| C | -1.690                | 0.096  | 5.713  | 2.624   | 3.160  | -1.768 |
| C | -1.286                | -1.066 | 7.818  | 5.038   | 3.602  | -1.633 |
| C | -1.704                | 0.129  | 8.527  | 5.110   | 3.536  | -3.066 |
| C | -1.240                | -1.121 | 10.638 | 7.511   | 3.979  | -2.935 |
| C | -1.674                | 0.107  | 9.948  | 6.339   | 3.721  | -3.733 |
| C | -1.223                | -1.156 | 12.007 | 8.750   | 4.168  | -3.539 |
| C | -1.686                | 0.014  | 12.752 | 8.874   | 4.029  | -4.977 |

|    |        |        |        |        |        |        |
|----|--------|--------|--------|--------|--------|--------|
| C  | -1.107 | -1.161 | 14.827 | 11.312 | 4.324  | -4.740 |
| C  | -1.717 | -0.043 | 14.153 | 10.140 | 4.209  | -5.596 |
| C  | 1.223  | -1.281 | 2.274  | 1.289  | 0.639  | 2.065  |
| C  | 0.028  | -1.654 | 1.559  | 0.107  | 1.498  | 2.062  |
| C  | 1.203  | -1.206 | 3.670  | 2.324  | 0.928  | 1.277  |
| C  | -0.028 | -1.662 | 4.380  | 2.582  | 2.346  | 0.888  |
| C  | 1.128  | -1.128 | 6.455  | 4.629  | 1.396  | -0.094 |
| C  | -0.071 | -1.630 | 5.738  | 3.752  | 2.584  | 0.240  |
| C  | 1.128  | -1.098 | 7.811  | 5.818  | 1.584  | -0.716 |
| C  | -0.071 | -1.579 | 8.547  | 6.250  | 2.976  | -1.076 |
| C  | 1.201  | -1.141 | 10.613 | 8.265  | 1.923  | -2.032 |
| C  | -0.035 | -1.597 | 9.897  | 7.442  | 3.145  | -1.708 |
| C  | 1.197  | -1.171 | 11.984 | 9.474  | 2.077  | -2.627 |
| C  | -0.012 | -1.669 | 12.700 | 9.913  | 3.468  | -2.946 |
| C  | 1.130  | -1.177 | 14.807 | 11.916 | 2.511  | -3.950 |
| C  | 0.001  | -1.717 | 14.087 | 11.168 | 3.651  | -3.480 |
| H  | 1.232  | 1.007  | 15.963 | 12.127 | 1.443  | -6.305 |
| H  | 1.240  | -1.327 | 15.876 | 12.968 | 2.567  | -4.210 |
| H  | -1.156 | 1.031  | 15.980 | 11.465 | 3.420  | -7.138 |
| H  | -1.207 | -1.312 | 15.898 | 12.276 | 4.627  | -5.135 |
| H  | -1.607 | -0.119 | 0.379  | -2.098 | 2.662  | 0.276  |
| H  | 0.054  | 1.498  | 0.349  | -2.122 | 0.210  | -0.566 |
| H  | 0.044  | -1.851 | 0.491  | -0.526 | 1.680  | 2.927  |
| H  | 1.705  | -0.178 | 0.430  | -0.535 | -0.697 | 2.076  |
| Mg | 3.412  | -0.008 | 7.123  | 3.080  | 0.635  | -4.766 |

---

Table 4S. Optimization geometries for the Sheet/Mg<sup>2+</sup> and Sheet/Mg complexes.

|   | Sheet/Mg <sup>2+</sup> |        |        | Sheet/Mg |        |        |
|---|------------------------|--------|--------|----------|--------|--------|
|   | X                      | Y      | Z      | X        | Y      | Z      |
| C | 2.840                  | -0.377 | -0.043 | -2.452   | 1.437  | -0.127 |
| C | 3.691                  | 0.750  | -0.049 | -3.679   | 0.738  | -0.122 |
| C | 3.367                  | -1.688 | -0.049 | -2.442   | 2.849  | -0.121 |
| C | 2.495                  | -2.821 | -0.052 | -1.201   | 3.555  | -0.121 |
| C | 1.423                  | -0.189 | -0.038 | -1.218   | 0.714  | -0.137 |
| C | 1.093                  | -2.647 | -0.038 | 0.018    | 2.842  | -0.127 |
| C | 0.548                  | -1.327 | -0.049 | 0.009    | 1.412  | -0.136 |
| C | 0.221                  | -3.759 | -0.052 | 1.246    | 3.539  | -0.121 |
| C | -0.875                 | -1.138 | -0.038 | 1.227    | 0.698  | -0.136 |
| C | -1.746                 | -2.270 | -0.043 | 2.471    | 1.405  | -0.127 |
| C | -1.196                 | -3.571 | -0.049 | 2.478    | 2.817  | -0.121 |
| C | -3.145                 | -2.072 | -0.049 | 3.688    | 0.690  | -0.121 |
| C | 3.145                  | 2.071  | -0.051 | -3.688   | -0.690 | -0.122 |
| C | 1.746                  | 2.270  | -0.037 | -2.471   | -1.405 | -0.127 |
| C | 0.875                  | 1.138  | -0.049 | -1.227   | -0.698 | -0.137 |
| C | -0.548                 | 1.327  | -0.038 | -0.009   | -1.412 | -0.136 |
| C | -1.423                 | 0.189  | -0.048 | 1.218    | -0.714 | -0.137 |
| C | -2.839                 | 0.377  | -0.038 | 2.452    | -1.437 | -0.127 |
| C | -3.691                 | -0.751 | -0.052 | 3.679    | -0.737 | -0.122 |
| C | 1.195                  | 3.571  | -0.051 | -2.478   | -2.817 | -0.121 |
| C | -0.221                 | 3.760  | -0.048 | -1.246   | -3.539 | -0.121 |
| C | -1.093                 | 2.648  | -0.043 | -0.018   | -2.842 | -0.127 |
| C | -2.495                 | 2.821  | -0.049 | 1.201    | -3.555 | -0.121 |
| C | -3.366                 | 1.688  | -0.052 | 2.442    | -2.849 | -0.121 |
| C | -2.065                 | -4.693 | -0.066 | 3.715    | 3.516  | -0.113 |
| C | -4.007                 | -3.200 | -0.066 | 4.921    | 1.397  | -0.113 |
| C | -3.447                 | -4.482 | -0.073 | 4.909    | 2.793  | -0.111 |
| C | -5.430                 | -2.974 | -0.081 | 6.145    | 0.638  | -0.108 |
| C | -5.097                 | -0.559 | -0.067 | 4.903    | -1.459 | -0.114 |
| C | -5.946                 | -1.722 | -0.081 | 6.136    | -0.716 | -0.108 |
| C | -4.774                 | 1.870  | -0.066 | 3.670    | -3.564 | -0.113 |
| C | -5.604                 | 0.745  | -0.073 | 4.873    | -2.855 | -0.111 |
| H | -6.682                 | 0.888  | -0.089 | 5.812    | -3.405 | -0.104 |
| H | -7.022                 | -1.575 | -0.096 | 7.071    | -1.271 | -0.102 |
| H | -6.088                 | -3.837 | -0.096 | 7.086    | 1.181  | -0.102 |
| H | -4.110                 | -5.343 | -0.089 | 5.855    | 3.330  | -0.104 |
| C | 5.097                  | 0.558  | -0.066 | -4.903   | 1.459  | -0.114 |
| C | 5.947                  | 1.722  | -0.079 | -6.136   | 0.716  | -0.108 |
| C | 5.605                  | -0.745 | -0.072 | -4.873   | 2.855  | -0.111 |
| C | 4.775                  | -1.870 | -0.066 | -3.670   | 3.564  | -0.113 |

|    |        |        |        |        |        |        |
|----|--------|--------|--------|--------|--------|--------|
| C  | 5.430  | 2.974  | -0.079 | -6.145 | -0.638 | -0.108 |
| C  | 4.007  | 3.199  | -0.065 | -4.921 | -1.397 | -0.114 |
| C  | 3.447  | 4.481  | -0.071 | -4.909 | -2.792 | -0.111 |
| C  | 2.065  | 4.693  | -0.065 | -3.715 | -3.516 | -0.113 |
| C  | 6.682  | -0.888 | -0.088 | -5.811 | 3.405  | -0.104 |
| H  | 7.022  | 1.575  | -0.094 | -7.071 | 1.271  | -0.102 |
| H  | 6.088  | 3.837  | -0.094 | -7.086 | -1.181 | -0.102 |
| H  | 4.110  | 5.342  | -0.086 | -5.855 | -3.330 | -0.104 |
| C  | -0.768 | 5.070  | -0.065 | -1.251 | -4.960 | -0.113 |
| C  | -2.157 | 5.226  | -0.072 | -0.036 | -5.648 | -0.110 |
| C  | -3.032 | 4.135  | -0.066 | 1.188  | -4.976 | -0.113 |
| C  | -4.464 | 4.289  | -0.080 | 2.448  | -5.672 | -0.107 |
| C  | -5.290 | 3.215  | -0.080 | 3.625  | -5.003 | -0.107 |
| C  | -4.875 | 5.294  | -0.095 | 2.435  | -6.759 | -0.102 |
| H  | -2.572 | 6.231  | -0.087 | -0.043 | -6.735 | -0.104 |
| C  | 1.482  | 6.011  | -0.078 | -3.688 | -4.956 | -0.107 |
| C  | 0.139  | 6.189  | -0.079 | -2.520 | -5.640 | -0.107 |
| H  | 2.147  | 6.868  | -0.093 | -4.636 | -5.488 | -0.102 |
| H  | -0.279 | 7.191  | -0.093 | -2.521 | -6.727 | -0.102 |
| H  | -6.367 | 3.354  | -0.096 | 4.566  | -5.546 | -0.102 |
| C  | 3.032  | -4.135 | -0.066 | -1.187 | 4.976  | -0.113 |
| C  | 2.157  | -5.226 | -0.072 | 0.036  | 5.648  | -0.110 |
| C  | 0.767  | -5.069 | -0.066 | 1.251  | 4.960  | -0.113 |
| C  | -0.139 | -6.189 | -0.080 | 2.520  | 5.640  | -0.107 |
| C  | -1.482 | -6.011 | -0.080 | 3.689  | 4.956  | -0.107 |
| H  | 0.279  | -7.191 | -0.095 | 2.521  | 6.727  | -0.102 |
| H  | 2.572  | -6.230 | -0.088 | 0.043  | 6.735  | -0.104 |
| C  | 5.291  | -3.215 | -0.080 | -3.625 | 5.003  | -0.107 |
| C  | 4.464  | -4.289 | -0.080 | -2.448 | 5.672  | -0.107 |
| C  | 4.875  | -5.294 | -0.095 | -2.434 | 6.759  | -0.102 |
| H  | 6.367  | -3.354 | -0.095 | -4.566 | 5.547  | -0.102 |
| H  | -2.147 | -6.869 | -0.095 | 4.636  | 5.488  | -0.102 |
| Mg | 0.000  | 0.000  | 1.780  | -0.001 | -0.001 | 3.331  |

---

Table 5S. The frequencies associated with the Mg<sup>2+</sup> and Mg species and nanostructures.

| Nanostructure          | $\nu_1(\text{cm}^{-1})$<br>Bending | $\nu_2(\text{cm}^{-1})$<br>Stretching |
|------------------------|------------------------------------|---------------------------------------|
| Cone/Mg <sup>2+</sup>  | 134.9                              | 310.8                                 |
| Cone/Mg                | 19.2                               | 68.0                                  |
| Tube/Mg <sup>2+</sup>  | 53.0                               | 353.2                                 |
| Tube/Mg                | 38.0                               | 292.4                                 |
| Sheet/Mg <sup>2+</sup> | 117.9                              | 418.2                                 |
| Sheet/Mg               | 19.7                               | 80.2                                  |
| C60/Mg <sup>2+</sup>   | 150.4                              | 320.6                                 |
| C60/Mg                 | 12.1                               | 54.5                                  |
